# Supplementary figures and images for: Genetic Diversity and Population Structure Analysis of Triticum aestivum L. Landrace Panel from Afghanistan
Source: MDPI journal article supplement (doi:10.3390/genes12030340), 2021-02-25

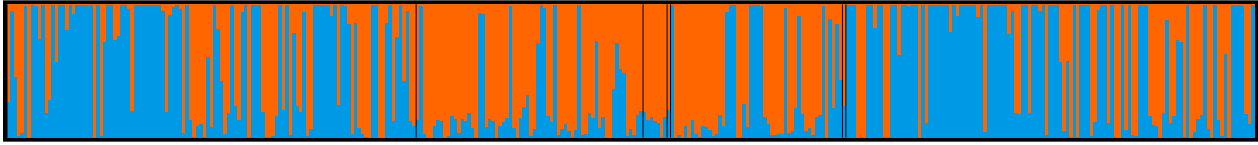

Badakhsha

Baghlan

Kabyl  
Konarha

Kunduz

Samangan

Takhar

Supplement: s1 [file s1]
